# Supplementary material for: The Associations Between Serum Insulin-like Growth Factor-I, Brain White Matter Volumes, and Cognition in Mild Cognitive Impairment and Alzheimer’s Disease
Source: PubMed Central journal article supplement (PMC11191442; doi:10.3233/jad-231026), 2024-05-14
Supplement: jad-99-jad231026-s001.pdf [file jad-99-jad231026-s001.pdf]

# Supplementary Material

## The Associations Between Serum Insulin-like Growth Factor-I, Brain White Matter Volumes, and Cognition in Mild Cognitive Impairment and Alzheimer's Disease

**Supplementary Table 1.** Demographic characteristics of SCI/MCI and AD patients with and without follow-up.

|                                      | Patients with follow-up |                   |                  | Patients with no follow-up |                   |                  |
|--------------------------------------|-------------------------|-------------------|------------------|----------------------------|-------------------|------------------|
|                                      | SCI/MCI*<br>(n = 48)    | AD**<br>(n = 27)  | <i>p</i>         | SCI/MCI*<br>(n = 58)       | AD**<br>(n = 32)  | <i>p</i>         |
| Age (y)                              | 66.0 (60.3-71.8)        | 66.0 (62.0-73.0)  | 0.51             | 62.0 (58.0-70.0)           | 70.5 (62.5-76.0)  | <b>&lt;0.01</b>  |
| Men/women (n, (%))                   | 18/30 (38/63)           | 14/13 (52/48)     | 0.23             | 16/42 (28/72)              | 14/18 (44/56)     | 0.12             |
| BMI (kg/m <sup>2</sup> )             | 23.9 (21.9-26.4)        | 23.9 (21.9-26.4)  | 0.88             | 25.2 (22.5-27.5)           | 24.3 (21.6-26.0)  | 0.18             |
| Serum HDL (mmol/L)                   | 1.7 (1.4-2.2)           | 1.8 (1.6-2.4)     | 0.45             | 1.9 (1.4-2.2)              | 1.8 (1.5-2.0)     | 0.68             |
| Serum LDL (mmol/L)                   | 3.2 (2.6-3.9)           | 3.4 (2.8-3.9)     | 0.80             | 3.4 (3.0-3.9)              | 3.3 (2.5-4.1)     | 0.66             |
| LDL/HDL ratio                        | 1.8 (1.3-2.5)           | 1.7 (1.4-2.4)     | 0.95             | 2.0 (1.5-2.4)              | 1.7 (1.4-2.4)     | 0.48             |
| Diastolic blood pressure (mmHg)      | 79 (74-84)              | 80 (74-84)        | 0.80             | 80 (74-88)                 |                   | 0.71             |
| Systolic blood pressure (mmHg)       | 139 (125-147)           | 150 (131-161)     | <b>0.049</b>     | 140 (127-155)              | 150 (132-168)     | <b>0.03</b>      |
| MAP (mmHg)                           | 98 (92-103)             | 99 (96-108)       | 0.16             | 99 (93-112)                | 105 (96-110)      | 0.16             |
| Education (y)                        | 14.0 (11.0-16.0)        | 13.0 (12.0-15.0)  | 0.72             | 14.0 (11.8-16.0)           | 12.0 (8.0-16.0)   | 0.13             |
| Hypertension (n, (%))                |                         |                   |                  |                            |                   |                  |
| Yes/No                               | 13/33 (28/72)           | 14/12 (54/46)     | <b>0.03</b>      | 23/31 (43/57)              | 20/12 (63/38)     | 0.07             |
| Smoking (n, (%))                     |                         |                   |                  |                            |                   |                  |
| Never/Previous/Current               | 25/5/18 (52/10/38)      | 15/2/9 (58/8/34)  | 0.87             | 36/2/20 (62/3/35)          | 20/3/9 (63/9/28)  | 0.46             |
| Serum IGF-I (ng/mL)                  | 120 (99-146)            | 113 (98-148)      | 0.77             | 108 (90-130)               | 123 (94-146)      | 0.20             |
| CSF/serum albumin ratio              | 5.3 (4.3-6.7)           | 7.2 (4.9-9.1)     | <b>0.04</b>      | 5.5 (4.4-7.3)              | 5.5 (4.6-8.0)     | 0.60             |
| CSF A $\beta$ <sub>1-42</sub> (ng/L) | 570 (455-890)           | 354 (279-485)     | <b>&lt;0.001</b> | 590 (455-765)              | 360 (240-426)     | <b>&lt;0.001</b> |
| CSF T-tau (ng/L)                     | 337 (221-473)           | 480 (316-634)     | <b>0.01</b>      | 310 (210-465)              | 580 (356-840)     | <b>&lt;0.001</b> |
| CSF P-tau (ng/L)                     | 52 (39-71)              | 75 (51-83)        | <b>0.01</b>      | 49 (37-60)                 | 82 (62-113)       | <b>&lt;0.001</b> |
| APOE $\epsilon$ 4, n (%)             |                         |                   |                  |                            |                   |                  |
| 0/1/2                                | 25/15/5 (56/33/11)      | 9/11/6 (35/42/23) | 0.18             | 25/25/3 (47/47/6)          | 8/17/5 (27/57/16) | 0.09             |

Values are presented as the median (25<sup>th</sup> – 75<sup>th</sup> percentiles) if not stated otherwise. Between-group differences were calculated using Mann-Whitney U tests for continuous variables and chi-square tests for categorical variables. Significant *p* values are given as bold text.

\*No differences were found between SCI/MCI patients with and without follow-up

\*\*No differences were found between AD patients with and without follow-up

A $\beta$ <sub>1-42</sub>, amyloid  $\beta$  amino acids 1 to 42; AD, Alzheimer's disease; APOE, apolipoprotein E; BMI, body mass index; CSF, cerebrospinal fluid; IGF-I, insulin-like growth factor-I; HDL, high-density lipoprotein-cholesterol; LDL, low-density lipoprotein-cholesterol; MAP, mean arterial pressure; MMSE, Mini-Mental State Examination; P-tau, phosphorylated tau; SCI/MCI, subjective/objective mild cognitive impairment; T-tau, total tau
